# Supplementary material for: Neuropeptides encoded by the genomes of the Akoya pearl oyster Pinctata fucata and Pacific oyster Crassostrea gigas: a bioinformatic and peptidomic survey
Source: Springer Nature journal article supplement (doi:10.1186/1471-2164-15-840), 2014-10-02

**Buccalin**

GLDRYSFGGLa

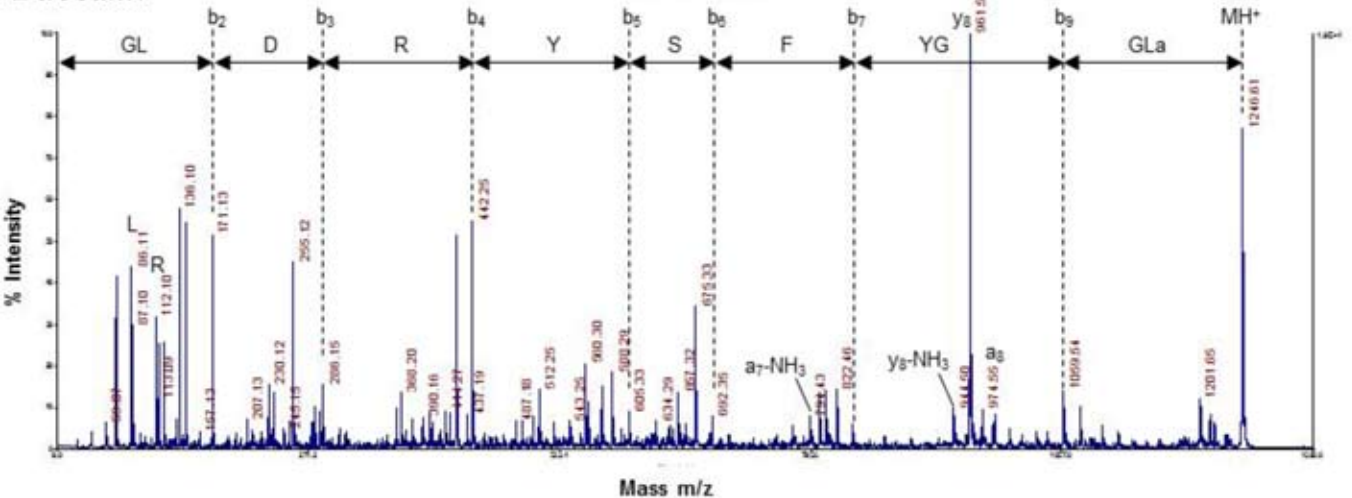**Cerebrin**

NLGTVDSLYNLPDLLYRa

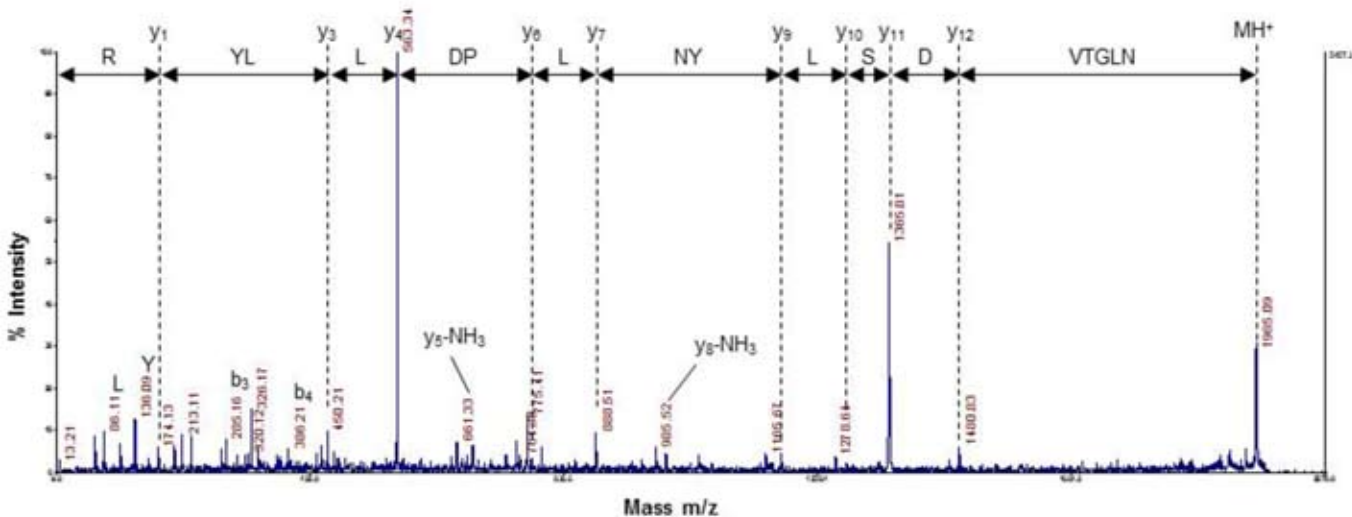**FFa**

GMNPNMNSLFFa

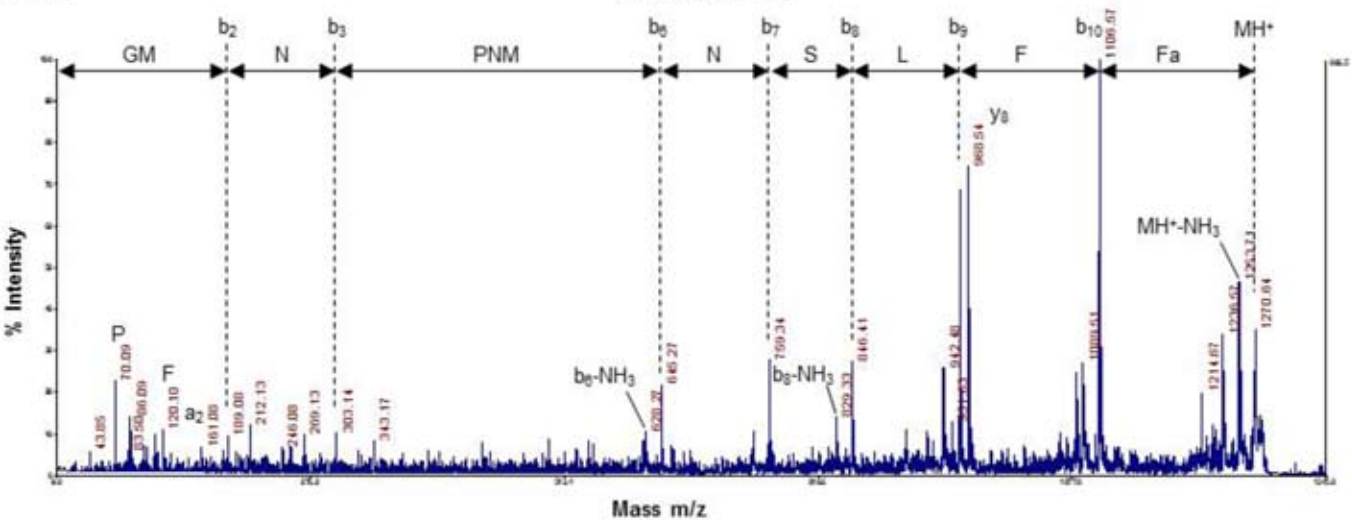

Supplement: 12864_2014_6547_MOESM3_ESM.pdf [file 12864_2014_6547_MOESM3_ESM.pdf]
