# Supplementary material for: Neuropeptides encoded by the genomes of the Akoya pearl oyster Pinctata fucata and Pacific oyster Crassostrea gigas: a bioinformatic and peptidomic survey
Source: Springer Nature journal article supplement (doi:10.1186/1471-2164-15-840), 2014-10-02
Supplement: 12864_2014_6547_MOESM6_ESM.pdf [file 12864_2014_6547_MOESM6_ESM.pdf]

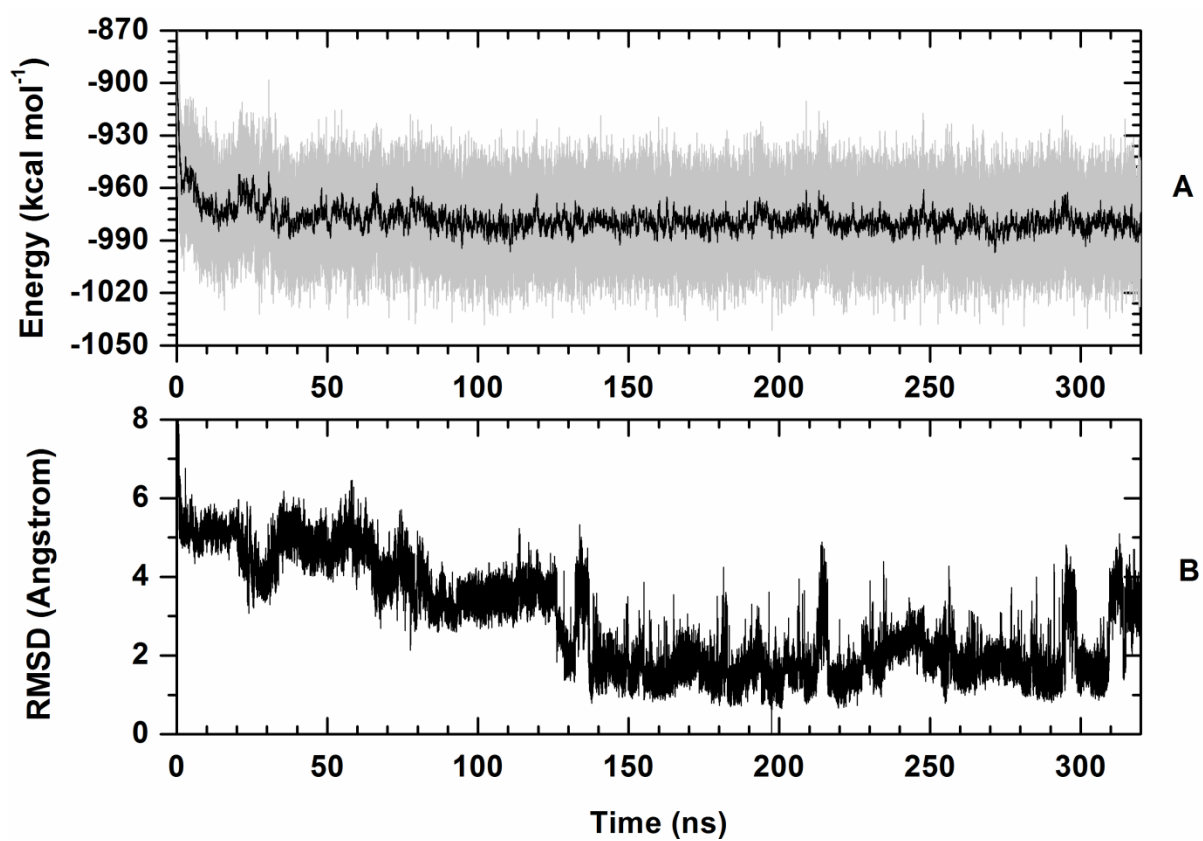

**Figure 1** (A) Potential energy of Pfu-ELH1 as a function of time during MD. The solid line is a running average over 100 ps. (B) Backbone rmsd during the same MD, compared to the lowest-energy conformation (the representative structure).

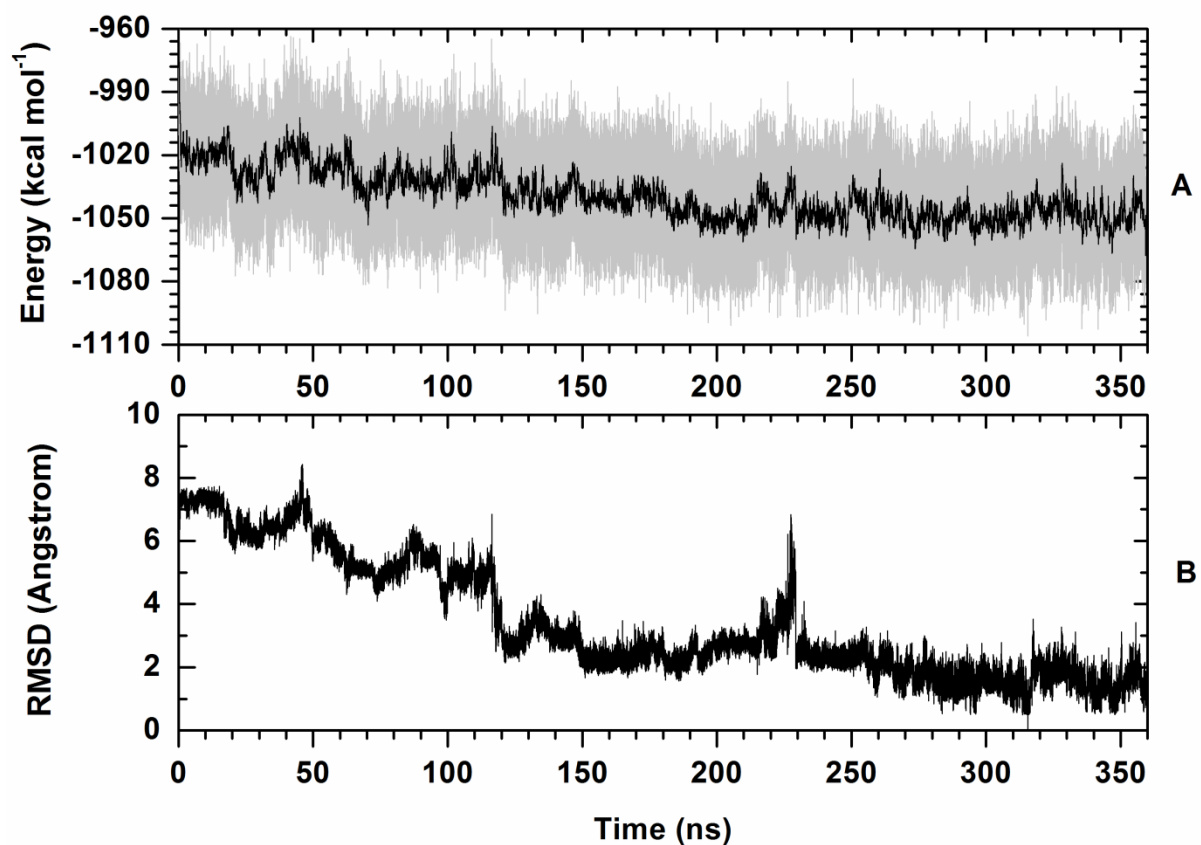

**Figure 2** (A) Potential energy of Pfu-ELH2 as a function of time during MD. The solid line is a running average over 100 ps. (B) Backbone rmsd during the same MD, compared to the lowest-energy conformation (the representative structure).

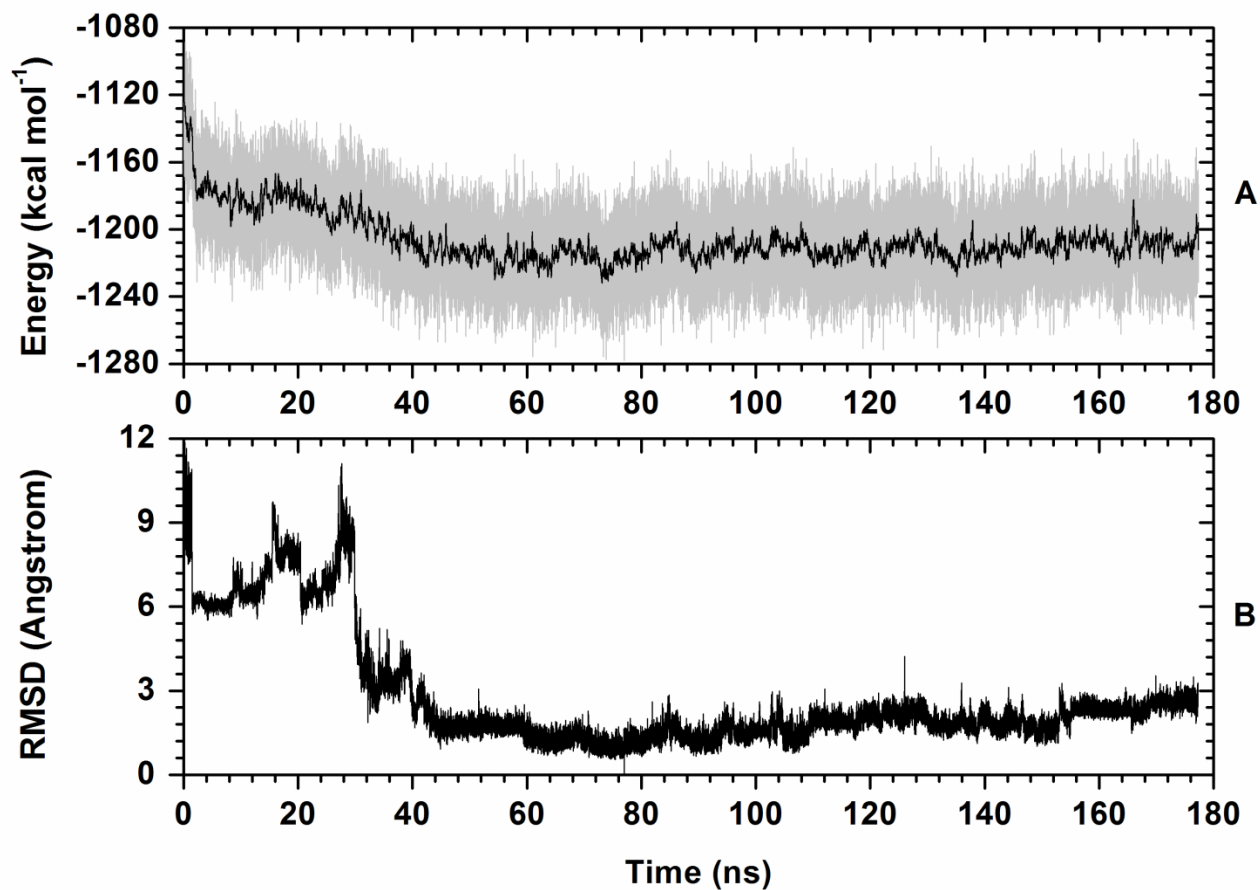

**Figure 3** (A) Potential energy of Cgi-ELH1 as a function of time during MD. The solid line is a running average over 100 ps. (B) Backbone rmsd during the same MD, compared to the lowest-energy conformation (the representative structure).

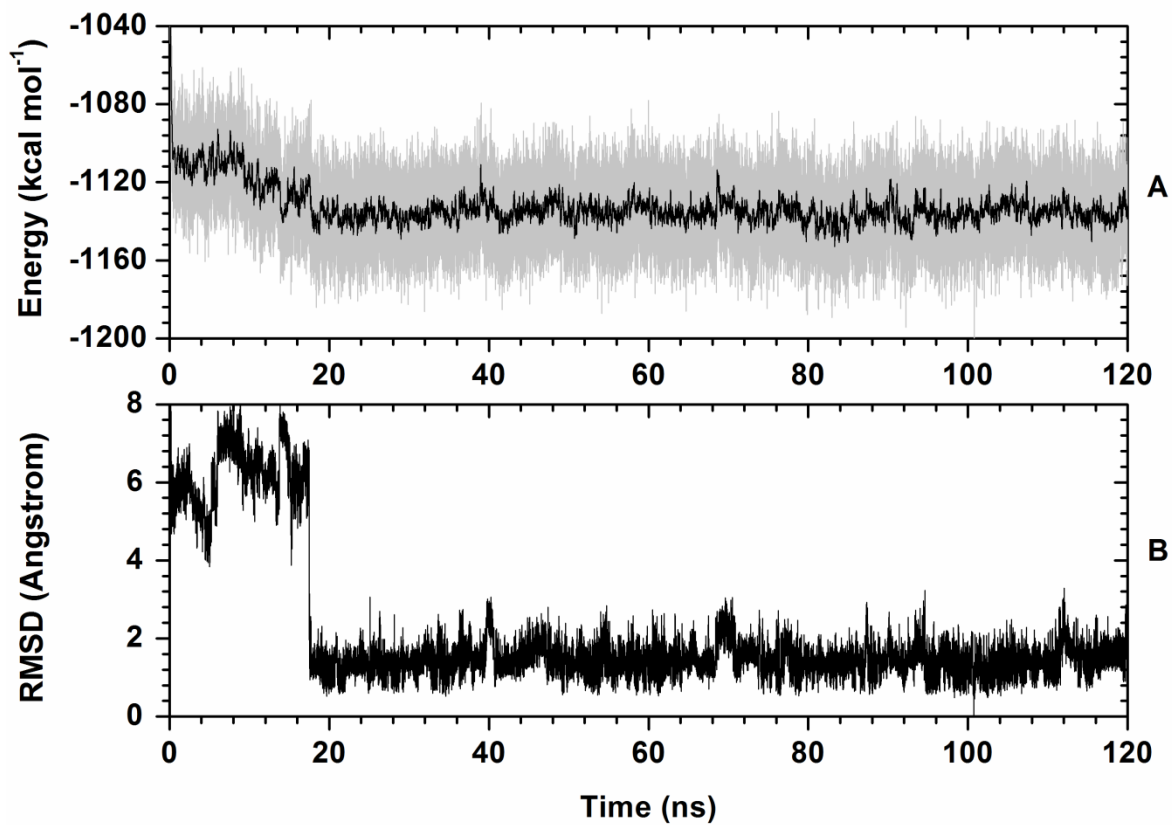

**Figure 4** (A) Potential energy of Cgi-ELH2 as a function of time during MD. The solid line is a running average over 100 ps. (B) Backbone rmsd during the same MD, compared to the lowest-energy conformation (the representative structure).

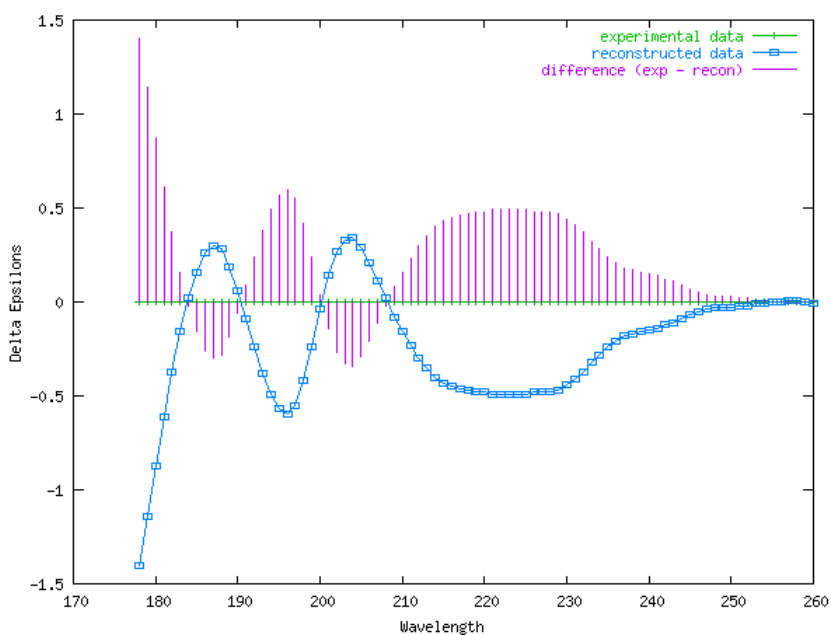

**Figure 5.** CD spectral analysis of Pf-ELH1.
